# Supplementary material for: Quality Improvement Approach to Increase Inpatient Pediatric Secondhand Smoke Exposure Screening
Source: Oxford University Press journal article supplement (doi:10.1542/hpeds.2021-005941), 2021-12-06
Supplement: hpeds.2021-005941supplementarydata.pdf [file hpeds.2021-005941supplementarydata.pdf]

## Supplemental Materials

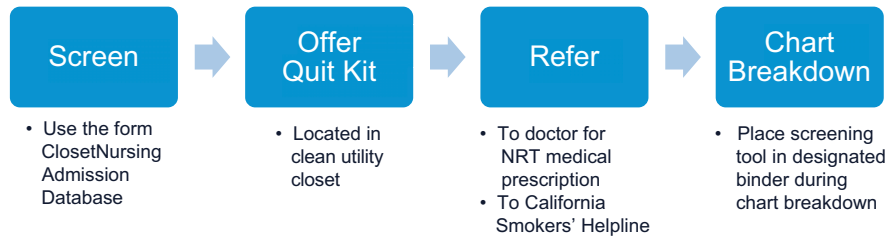

**SUPPLEMENTAL FIGURE 4** SHSe screening and smoking cessation referral workflow for nursing staff working in the pediatric unit.

**SUPPLEMENTAL INFORMATION** Slides used to facilitate nursing training about new workflow, smoking cessation referral resources, and the impact of SHSe on children's health. Available online at <https://doi.org/10.1542/hpeds.2021-005941>.

---
